# Supplementary material for: Thermodynamics of binding of divalent magnesium and manganese to uridine phosphates: implications for diabetes-related hypomagnesaemia and carbohydrate biocatalysis
Source: PubMed Central journal article supplement (PMC2490692; doi:10.1186/1752-153x-2-15), 2008-07-15
Supplement: 1752-153X-2-15-S1.pdf [file 1752-153X-2-15-S1.pdf]

# SUPPORTING INFORMATION

## Thermodynamics of Binding of Divalent Magnesium and Manganese to Uridine Phosphates: Implications for Carbohydrate Biocatalysis

*Corbin J. Zea, Gulden Camci-Unal, and Nicola L. Pohl*

*Department of Chemistry and the Plant Sciences Institute, Iowa State University, Gilman Hall, Ames, IA,  
50011-3111*

E-mail: npohl@iastate.edu

### **Table of Contents**

|                                                                                                                                                                  |        |
|------------------------------------------------------------------------------------------------------------------------------------------------------------------|--------|
| Table S1. Thermodynamic values for the binding of $Mg^{+2}$ and $Mn^{+2}$ to phosphates at 310 K                                                                 | S2     |
| Table S2. Percentage of phosphates bound to $Mg^{+2}$ and $Mn^{+2}$ when the concentration of $Mg^{+2}$ and $Mn^{+2}$ is 1.5 mM and 10 nM respectfully at 310 K. | S3     |
| Figure S1- S11. Thermograms and binding isotherms of $Mg^{+2}$ – phosphates                                                                                      | S4-S9  |
| Figure S12- S22. Thermograms and binding isotherms of $Mn^{+2}$ – phosphates                                                                                     | S9-S14 |

**Table S1.** Thermodynamic values for the binding of Mg<sup>+2</sup> and Mn<sup>+2</sup> to phosphates at 310 K.

| Metal <sup>a</sup> | Substrate  | <i>n</i>      | <i>K</i><br>(M <sup>-1</sup> ) | ΔG<br>(cal/mol) | ΔH<br>(cal/mol) | ΔS<br>(cal/mol·T) |
|--------------------|------------|---------------|--------------------------------|-----------------|-----------------|-------------------|
| Mg <sup>+2</sup>   | UTP        | 0.991 ± 0.005 | 14,300 ± 700                   | -5878           | 3730 ± 30       | 31.0              |
| Mg <sup>+2</sup>   | UDP        | 0.990 ± 0.004 | 3170 ± 70                      | -4952           | 3480 ± 20       | 27.2              |
| Mg <sup>+2</sup>   | UMP        | 1.07 ± 0.07   | 270 ± 9                        | -3430           | 570 ± 10        | 12.9              |
| Mg <sup>+2</sup>   | UDP-Glc    | 0.99 ± 0.05   | 250 ± 20                       | -3399           | 510 ± 40        | 12.6              |
| Mg <sup>+2</sup>   | Glc-1-P    | 0.96 ± 0.02   | 185 ± 4                        | -3206           | 1040 ± 20       | 13.7              |
| Mg <sup>+2</sup>   | PPi        | 1.030 ± 0.006 | 41,000 ± 2,000                 | -6539           | -1770 ± 10      | 15.4              |
| Mg <sup>+2</sup>   | UDP-GlcNAc | 0.951 ± 0.100 | 110 ± 10                       | -2911           | 930 ± 200       | 12.4              |
| Mg <sup>+2</sup>   | GlcNAc-1-P | 0.775 ± 0.100 | 180 ± 20                       | -3180           | 1000 ± 100      | 13.5              |
| Mg <sup>+2</sup>   | GlcNAc     |               | No Binding                     |                 |                 |                   |
| Mg <sup>+2</sup>   | Glc        |               | No Binding                     |                 |                 |                   |
| Mg <sup>+2</sup>   | U          |               | No Binding                     |                 |                 |                   |
| Mn <sup>+2</sup>   | UTP        | 1.02 ± 0.02   | 13,000 ± 2000                  | -5829           | 2390 ± 60       | 26.5              |
| Mn <sup>+2</sup>   | UDP        | 0.998 ± 0.008 | 2800 ± 2                       | -4885           | 2930 ± 30       | 25.2              |
| Mn <sup>+2</sup>   | UMP        | 1.01 ± 0.03   | 300 ± 8                        | -3507           | 1640 ± 30       | 16.6              |
| Mn <sup>+2</sup>   | UDP-Glc    | 1.00 ± 0.04   | 169 ± 8                        | -3165           | 1550 ± 80       | 15.2              |
| Mn <sup>+2</sup>   | Glc-1-P    | 1.02 ± 0.01   | 340 ± 7                        | -3575           | 1760 ± 20       | 17.2              |
| Mn <sup>+2</sup>   | PPi        | 1.02 ± 0.006  | 288,000 ± 2,200                | -7747           | -5614 ± 80      | 6.9               |
| Mn <sup>+2</sup>   | UDP-GlcNAc | 1.21 ± 0.03   | 124 ± 4                        | -2979           | 1550 ± 50       | 14.6              |
| Mn <sup>+2</sup>   | GlcNAc-1-P | 0.98 ± 0.02   | 179 ± 4                        | -3192           | 2510 ± 60       | 18.4              |
| Mn <sup>+2</sup>   | GlcNAc     |               | No Binding                     |                 |                 |                   |
| Mn <sup>+2</sup>   | Glc        |               | No Binding                     |                 |                 |                   |
| Mn <sup>+2</sup>   | U          |               | No Binding                     |                 |                 |                   |

<sup>a</sup>Ratio of Metal to Substrate (*n*), binding constant (*K*), free energy (ΔG) as calculated from the free energy relationship ΔG = ΔH – TΔS, enthalpy of binding (ΔH), and entropy of binding (ΔS).

**Table S2.** Percentage of phosphates bound to Mg<sup>+2</sup> and Mn<sup>+2</sup> when the concentration of Mg<sup>+2</sup> and Mn<sup>+2</sup> is 1.5 mM and 10 nM respectfully at 310 K.

| Metal            | Substrate  | % Bound <sup>a</sup> |
|------------------|------------|----------------------|
| Mg <sup>+2</sup> | UTP        | 96                   |
| Mg <sup>+2</sup> | UDP        | 83                   |
| Mg <sup>+2</sup> | UMP        | 29                   |
| Mg <sup>+2</sup> | UDP-Glc    | 27                   |
| Mg <sup>+2</sup> | Glc-1-P    | 22                   |
| Mg <sup>+2</sup> | PPi        | 98                   |
| Mg <sup>+2</sup> | UDP-GlcNAc | 14                   |
| Mg <sup>+2</sup> | GlcNAc-1-P | 21                   |
| Mn <sup>+2</sup> | UTP        | 0                    |
| Mn <sup>+2</sup> | UDP        | 0                    |
| Mn <sup>+2</sup> | UMP        | 0                    |
| Mn <sup>+2</sup> | UDP-Glc    | 0                    |
| Mn <sup>+2</sup> | Glc-1-P    | 0                    |
| Mn <sup>+2</sup> | PPi        | 0                    |
| Mn <sup>+2</sup> | UDP-GlcNAc | 0                    |
| Mn <sup>+2</sup> | GlcNAc-1-P | 0                    |

<sup>a</sup>Percentage free uridine phosphate as determined from the binding constant, *K*.

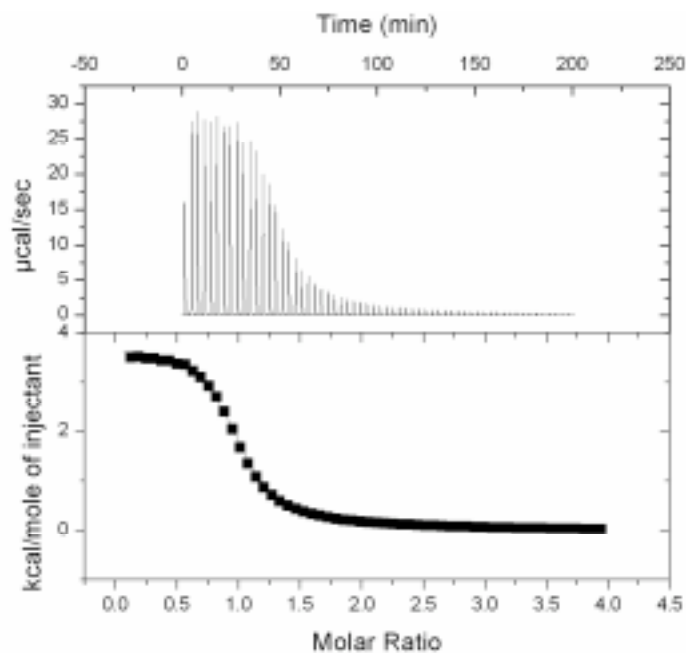

**Figure S1.** Thermogram (top) and binding isotherm (bottom) showing the addition of 75 mM  $\text{MgCl}_2$  (syringe, 60 – 2.5  $\mu\text{L}$  injections) into 2.1 mM UTP (cell) in 100 mM HEPES at pH 7.5 and 37 °C.

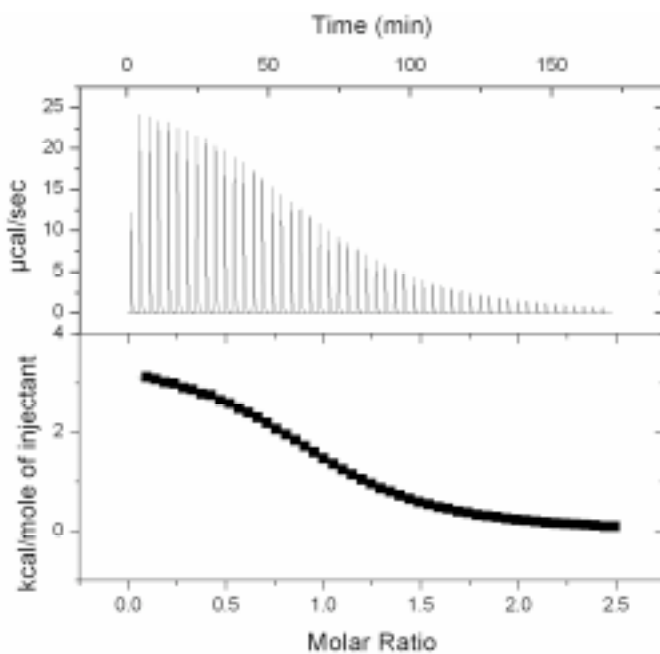

**Figure S2.** Thermogram (top) and binding isotherm (bottom) showing the addition of 75 mM  $\text{MgCl}_2$  (syringe, 120 – 2.5  $\mu\text{L}$  injections) into 2.8 mM UDP (cell) in 100 mM HEPES at pH 7.5 and 37 °C.

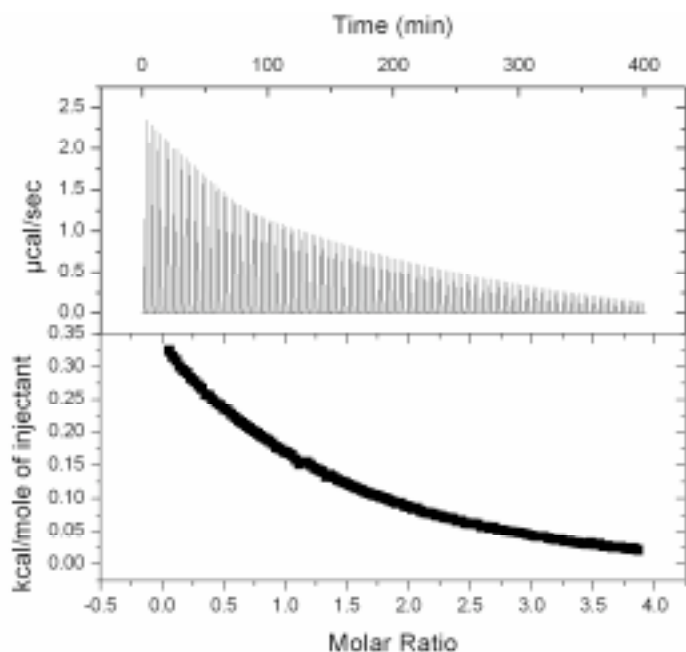

**Figure S3.** Thermogram (top) and binding isotherm (bottom) showing the addition of 75 mM  $\text{MgCl}_2$  (syringe, 120 – 2.5  $\mu\text{L}$  injections) into 4.5 mM UMP (cell) in 100 mM HEPES at pH 7.5 and 37 °C.

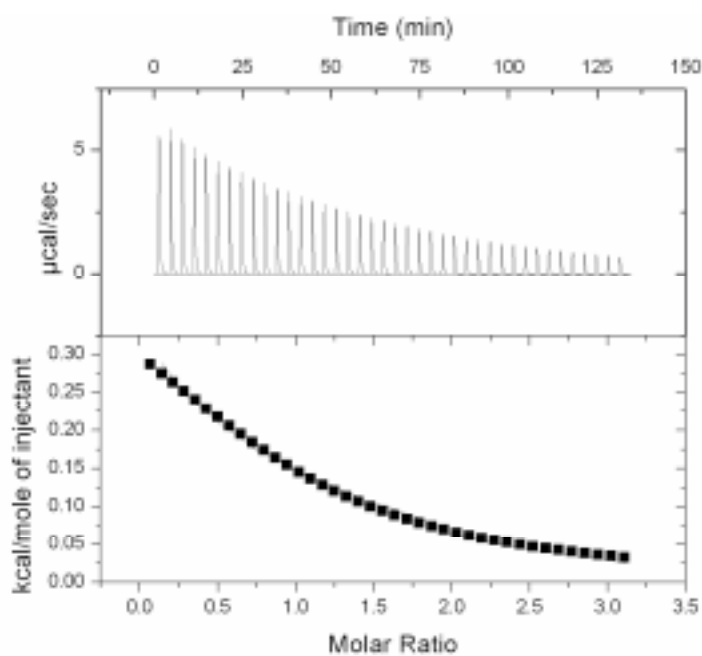

**Figure S4.** Thermogram (top) and binding isotherm (bottom) showing the addition of 75 mM  $\text{MgCl}_2$  (syringe, 40 – 7.5  $\mu\text{L}$  injections) into 5.6 mM UDP-Glc (cell) in 100 mM HEPES at pH 7.5 and 37 °C.

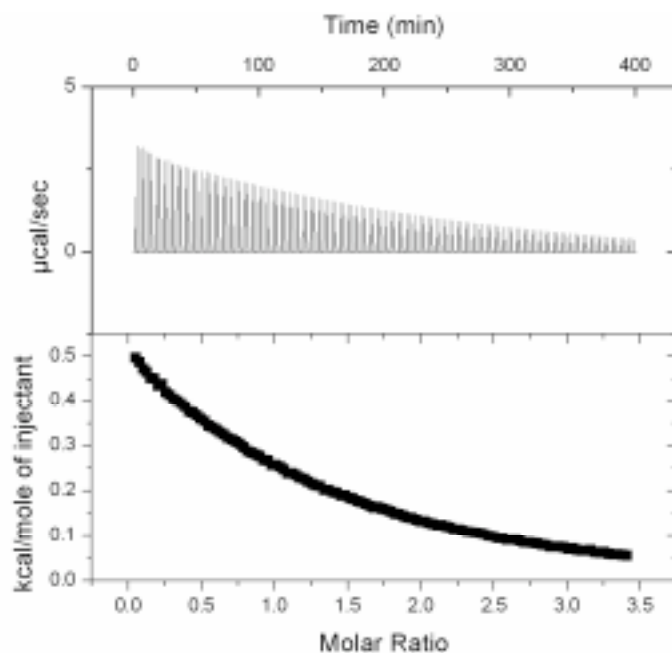

**Figure S5.** Thermogram (top) and binding isotherm (bottom) showing the addition of 75 mM  $\text{MgCl}_2$  (syringe, 120 – 2.5  $\mu\text{L}$  injections) into 5.1 mM  $\alpha\text{-D-glucose-1-phosphate}$  (cell) in 100 mM HEPES at pH 7.5 and 37  $^\circ\text{C}$ .

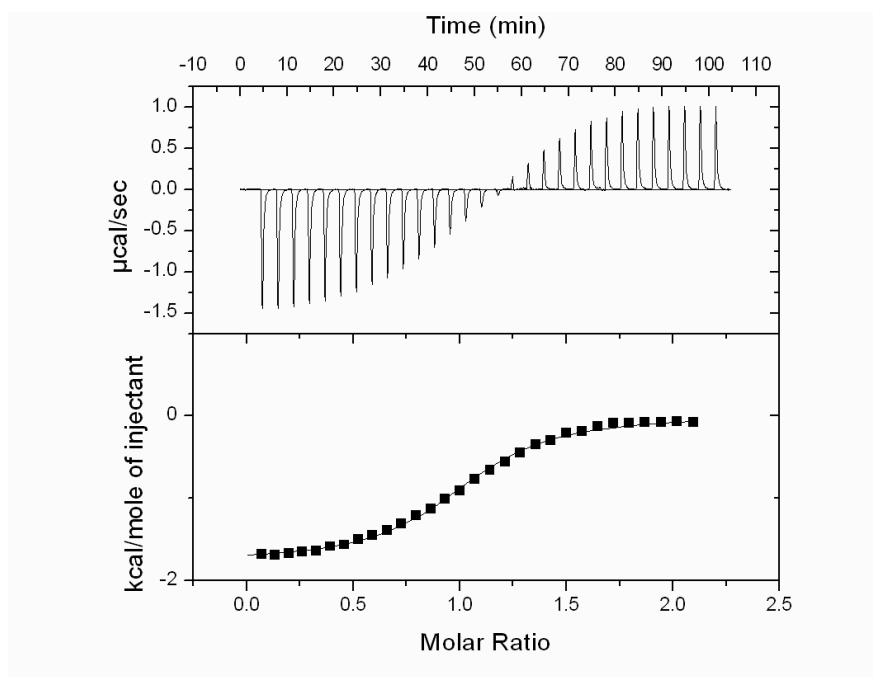

**Figure S6.** Thermogram (top) and binding isotherm (bottom) showing the addition of 4.5 mM  $\text{MgCl}_2$  (syringe, 120 – 2.5  $\mu\text{L}$  injections) into 0.5 mM pyrophosphate (cell) in 100 mM HEPES at pH 7.5 and 37  $^\circ\text{C}$ .

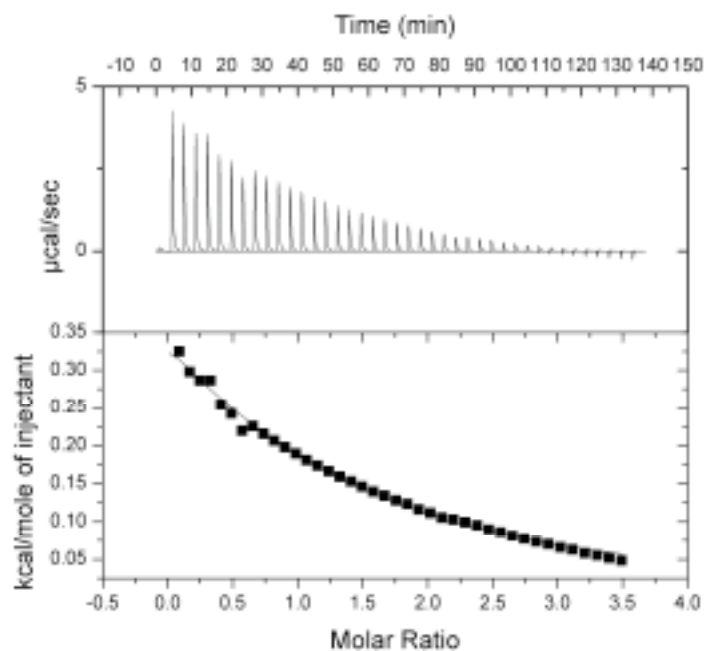

**Figure S7.** Thermogram (top) and binding isotherm (bottom) showing the addition of 75 mM  $\text{MgCl}_2$  (syringe, 40 – 7.5  $\mu\text{L}$  injections) into 5 mM UDP-GlcNAc (cell) in 100 mM HEPES at pH 7.5 and 37 °C.

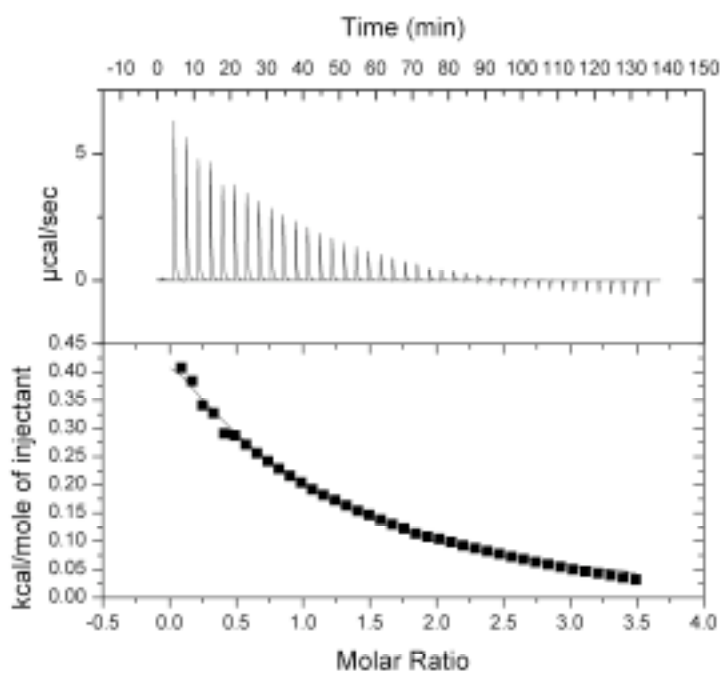

**Figure S8.** Thermogram (top) and binding isotherm (bottom) showing the addition of 75 mM  $\text{MgCl}_2$  (syringe, 40 – 7.5  $\mu\text{L}$  injections) into 5 mM GlcNAc-1-P (cell) in 100 mM HEPES at pH 7.5 and 37 °C.

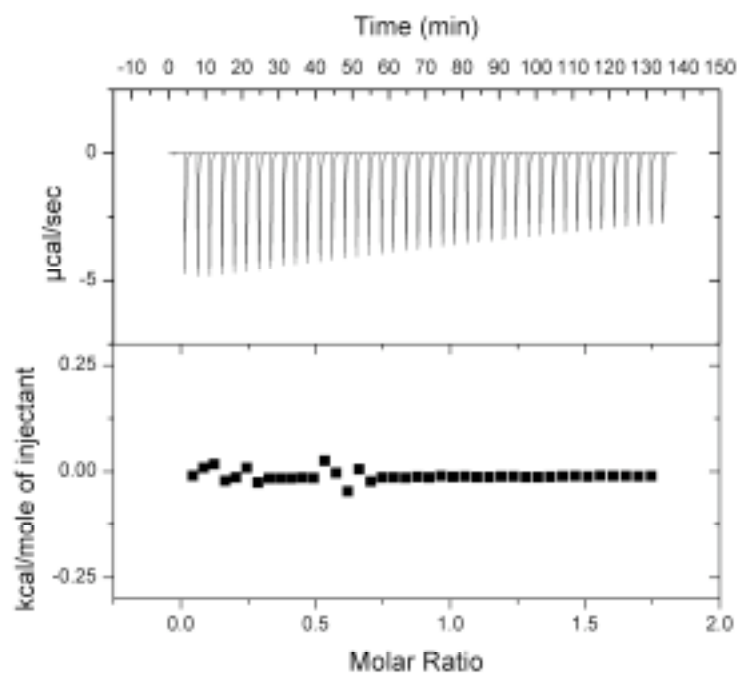

**Figure S9.** Thermogram (top) and binding isotherm (bottom) showing the addition of 75 mM  $\text{MgCl}_2$  (syringe 40 \_ 7.5  $\mu\text{L}$  injections) into 10 mM GlcNAc (cell) in 100 mM HEPES at pH 7.5 and 37 °C.

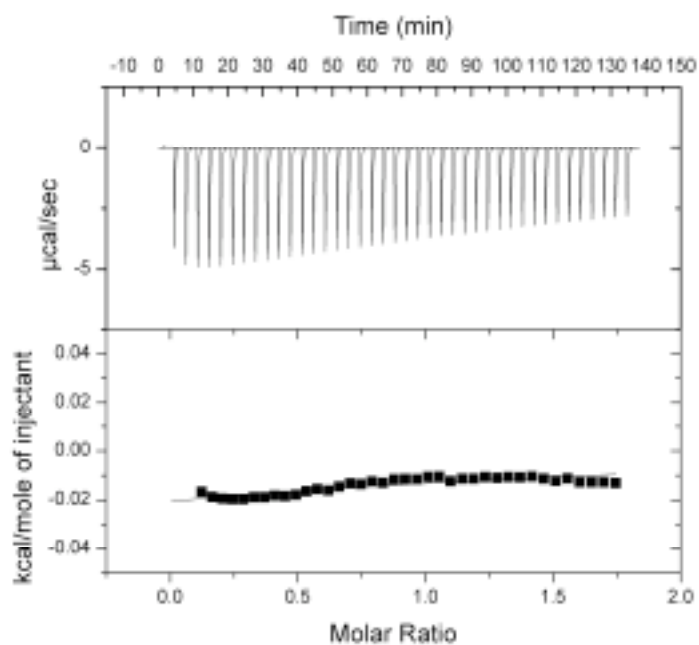

**Figure S10.** Thermogram (top) and binding isotherm (bottom) showing the addition of 75 mM  $\text{MgCl}_2$  (syringe 40 \_ 7.5  $\mu\text{L}$  injections) into 10 mM glucose (cell) in 100 mM HEPES at pH 7.5 and 37 °C.



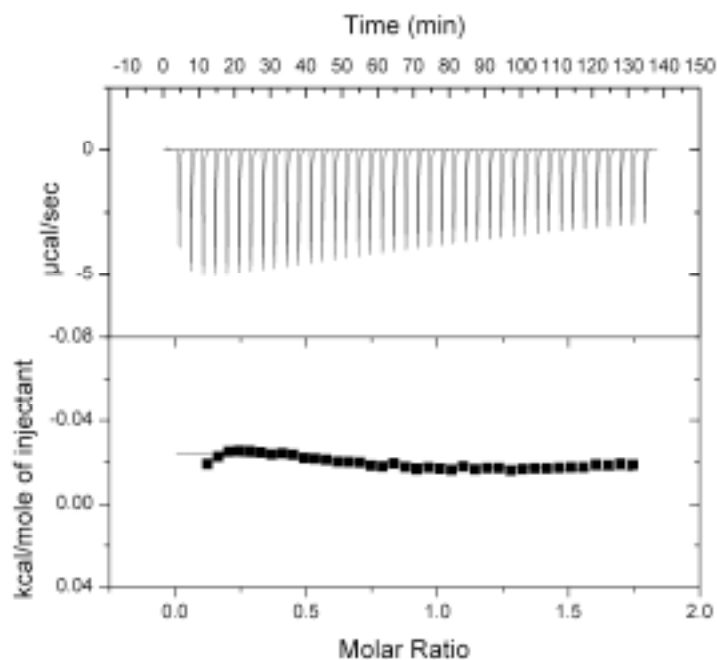

**Figure S11.** Thermogram (top) and binding isotherm (bottom) showing the addition of 75 mM  $\text{MgCl}_2$  (syringe 40 \_ 7.5  $\mu\text{L}$  injections) into 10 mM uridine (cell) in 100 mM HEPES at pH 7.5 and 37 °C.

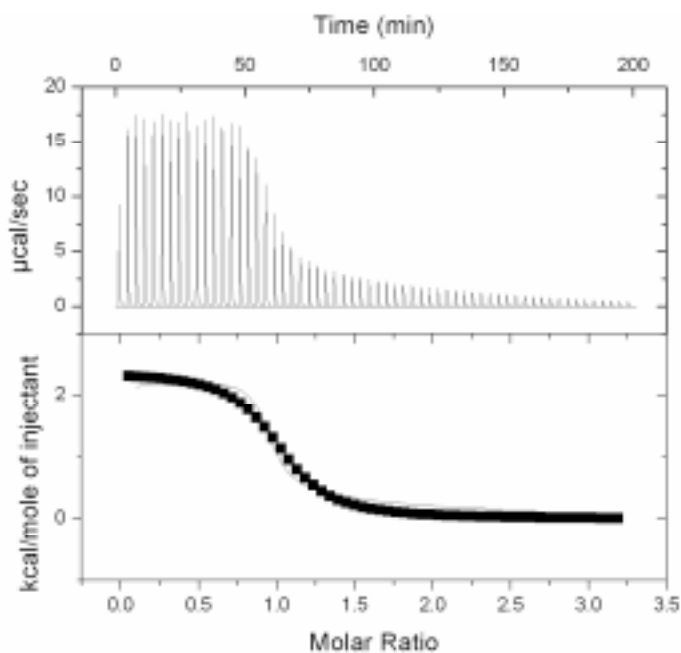

**Figure S12.** Thermogram (top) and binding isotherm (bottom) showing the addition of 75 mM  $\text{MnCl}_2$  (syringe, 60 – 2.5  $\mu\text{L}$  injections) into 2.5 mM UTP (cell) in 100 mM HEPES at pH 7.5 and 37 °C.

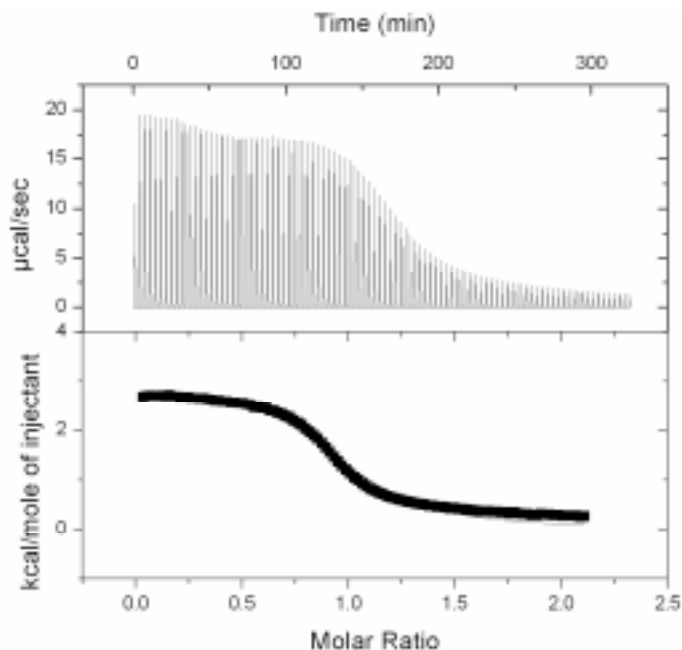

**Figure S13.** Thermogram (top) and binding isotherm (bottom) showing the addition of 75 mM  $\text{MnCl}_2$  (syringe, 120 – 2.5  $\mu\text{L}$  injections) into 7.5 mM UDP (cell) in 100 mM HEPES at pH 7.5 and 37 °C

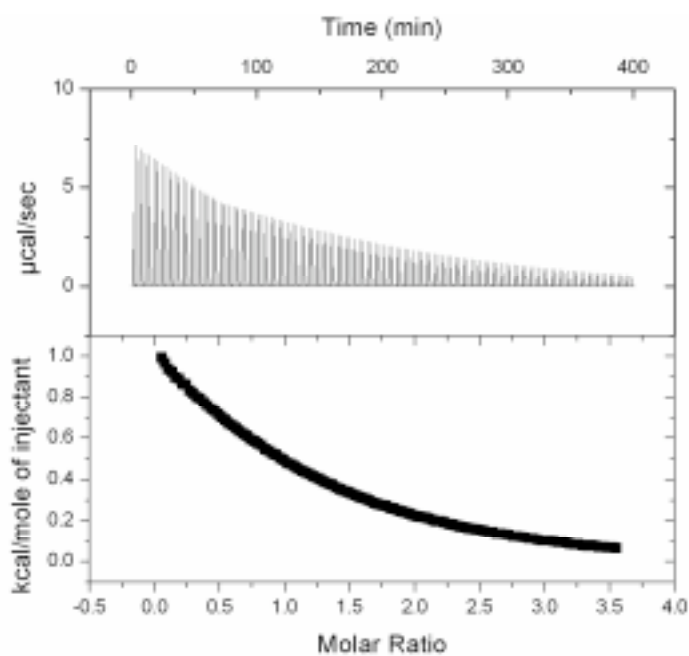

**Figure S14.** Thermogram (top) and binding isotherm (bottom) showing the addition of 75 mM  $\text{MnCl}_2$  (syringe, 120 – 2.5  $\mu\text{L}$  injections) into 4.9 mM UMP (cell) in 100 mM HEPES at pH 7.5 and 37 °C.

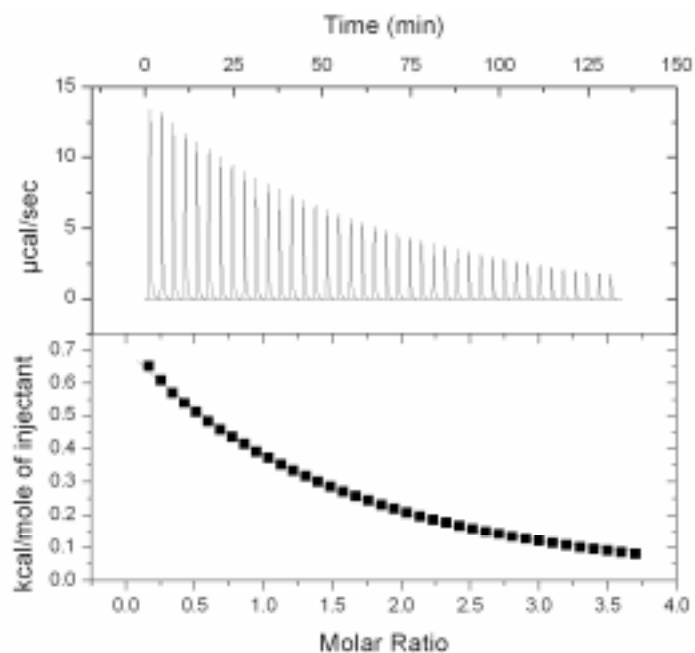

**Figure S15.** Thermogram (top) and binding isotherm (bottom) showing the addition of 75 mM  $\text{MnCl}_2$  (syringe, 40 – 7.5  $\mu\text{L}$  injections) into 4.7 mM UDP-Glc (cell) in 100 mM HEPES at pH 7.5 and 37 °C.

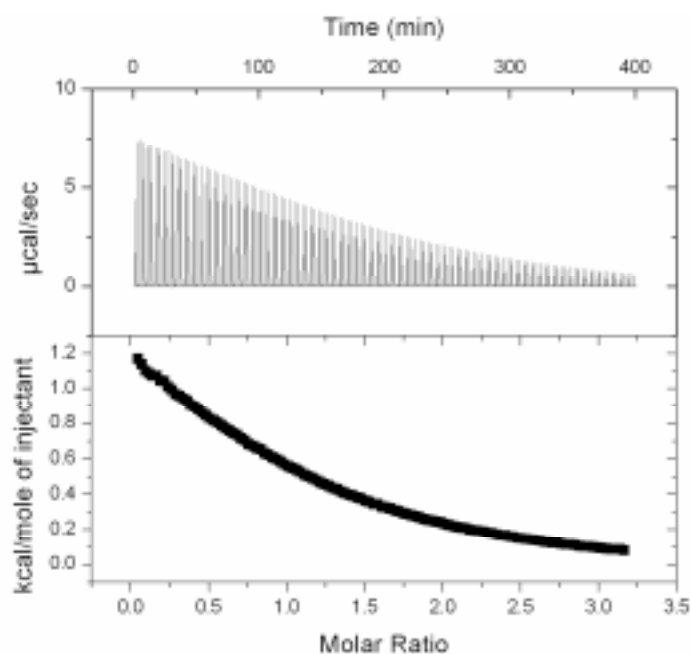

**Figure S16.** Thermogram (top) and binding isotherm (bottom) showing the addition of 75 mM  $\text{MnCl}_2$  (syringe, 120 – 2.5  $\mu\text{L}$  injections) into 5.5 mM  $\alpha\text{-D-glucose-1-phosphate}$  (cell) in 100 mM HEPES at pH 7.5 and 37 °C.

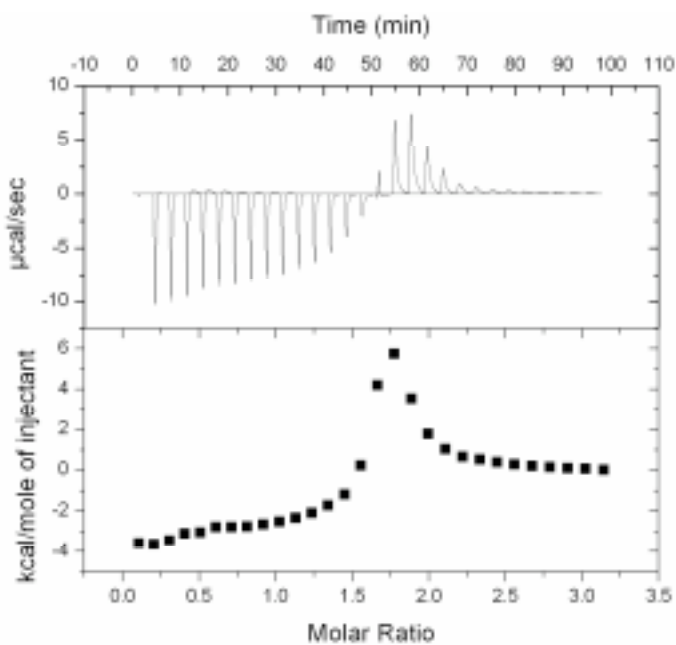

**Figure S17.** Thermogram (top) and binding isotherm (bottom) showing the addition of 4.5 mM  $\text{MnCl}_2$  (syringe, 30 – 10  $\mu\text{L}$  injections) into 0.5 mM pyrophosphate (cell) in 100 mM HEPES at pH 7.5 and 37  $^\circ\text{C}$ .

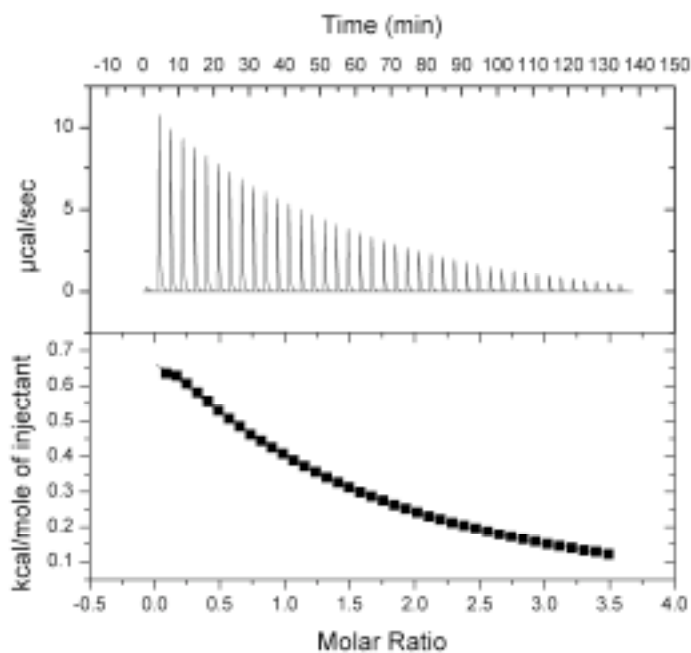

**Figure S18.** Thermogram (top) and binding isotherm (bottom) showing the addition of 75 mM  $\text{MnCl}_2$  (syringe, 40 – 7.5  $\mu\text{L}$  injections) into 5 mM UDP-GlcNAc (cell) in 100 mM HEPES at pH 7.5 and 37  $^\circ\text{C}$ .

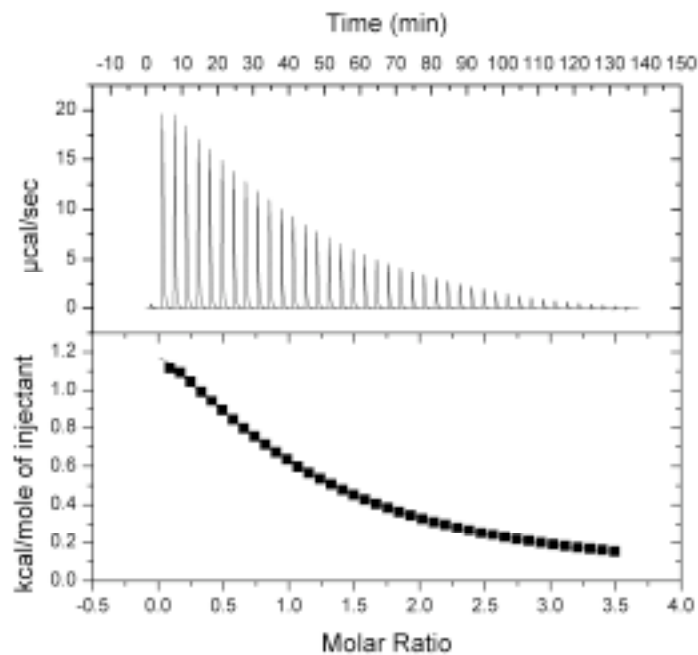

**Figure S19.** Thermogram (top) and binding isotherm (bottom) showing the addition of 75 mM  $\text{MnCl}_2$  (syringe, 40 – 7.5  $\mu\text{L}$  injections) into 5 mM GlcNAc-1-P (cell) in 100 mM HEPES at pH 7.5 and 37 °C.

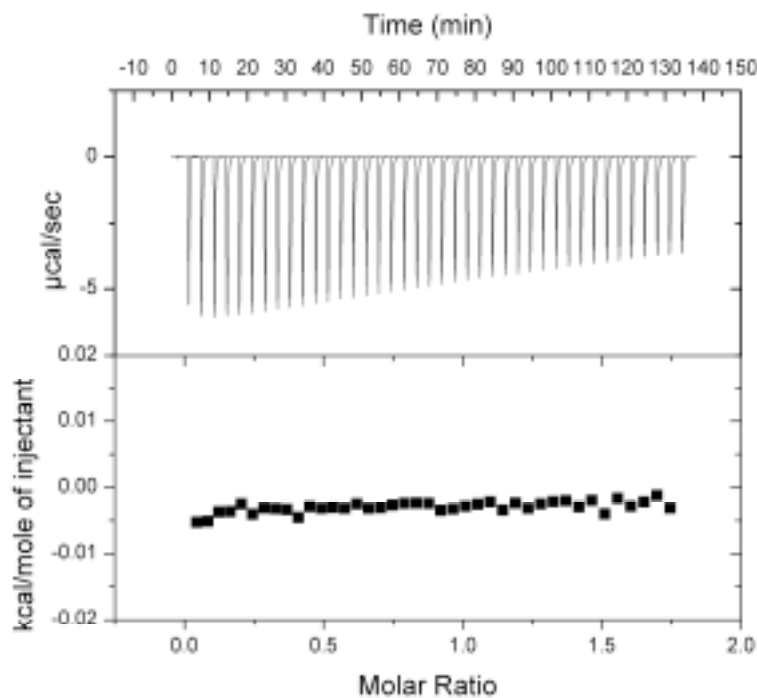

**Figure S20.** Thermogram (top) and binding isotherm (bottom) showing the addition of 75 mM  $\text{MnCl}_2$  (syringe 40 – 7.5  $\mu\text{L}$  injections) into 10 mM GlcNAc (cell) in 100 mM HEPES at pH 7.5 and 37 °C.

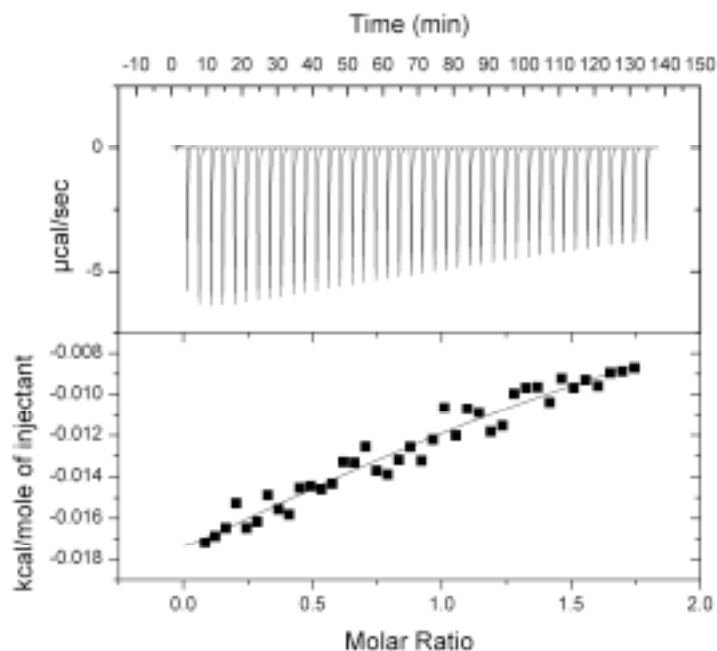

**Figure S21.** Thermogram (top) and binding isotherm (bottom) showing the addition of 75 mM  $\text{MnCl}_2$  (syringe 40 – 7.5  $\mu\text{L}$  injections) into 10 mM glucose (cell) in 100 mM HEPES at pH 7.5 and 37 °C.

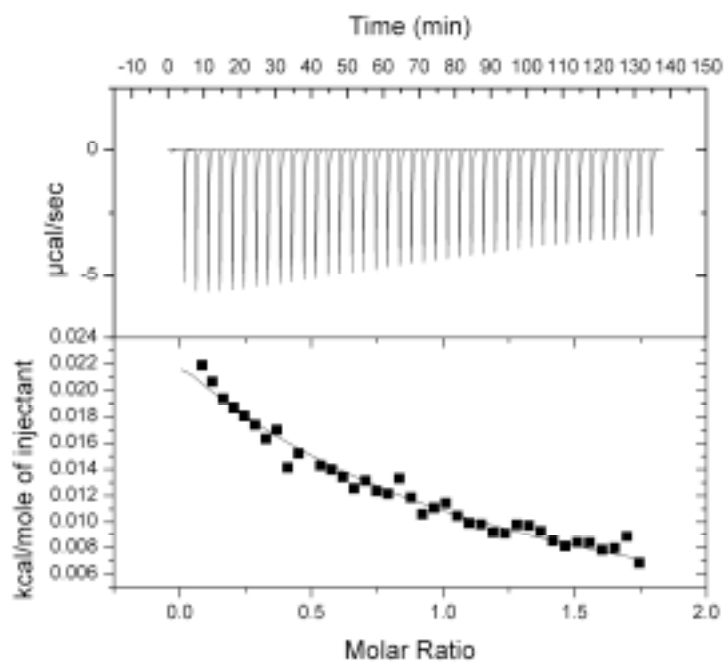

**Figure S22.** Thermogram (top) and binding isotherm (bottom) showing the addition of 75 mM  $\text{MnCl}_2$  (syringe 40 – 7.5  $\mu\text{L}$  injections) into 10 mM uridine (cell) in 100 mM HEPES at pH 7.5 and 37 °C.
